# Supplementary material for: Species-specific signatures of the microbiome from Camponotus and Colobopsis ants across developmental stages
Source: PLoS One. 2017 Nov 22;12(11):e0187461. doi: 10.1371/journal.pone.0187461 (PMC5699820; doi:10.1371/journal.pone.0187461)
Supplement: S1 Table — These results are evaluating variation in the composition and structure of bacterial communities (global effect), and the colonies/species and developmental stage that showed significant differences. (XLSX) [file pone.0187461.s004.xlsx]

## Sheet: Plan1
Table 1_supplementary. Results of analyses of similarity (ANOSIM) evaluating variation in the composition and structure of bacterial communities (global effect), and the colonies and sample type that showed significant differences.
Between Colonies	Sorensen Index		Bray-Curtis Index
Global effect	R2= 0.03284	p= 0.1012	R2= 0.4617	p= 0.0001
MOR#73 vs. MOR#62	R2= 0.077	p= 0.256	R2=0.9931	p= 0.0006
MOR#62 vs. MOR#69	R2=-0.0252	p= 1	R2= 0.7261	p= 0.0006
Between Developmental stage	Sorensen Index		Bray-Curtis Index
Global effect	R2= 0.0194	p= 0.241	R2= 0.0434	p= 0.1587
